# Supplementary material
Source: publisher figshare collection journal article supplement (https://frontiersin.figshare.com/ndownloader/files/26631737)
Supplement: Supplementary file [file 26631737]

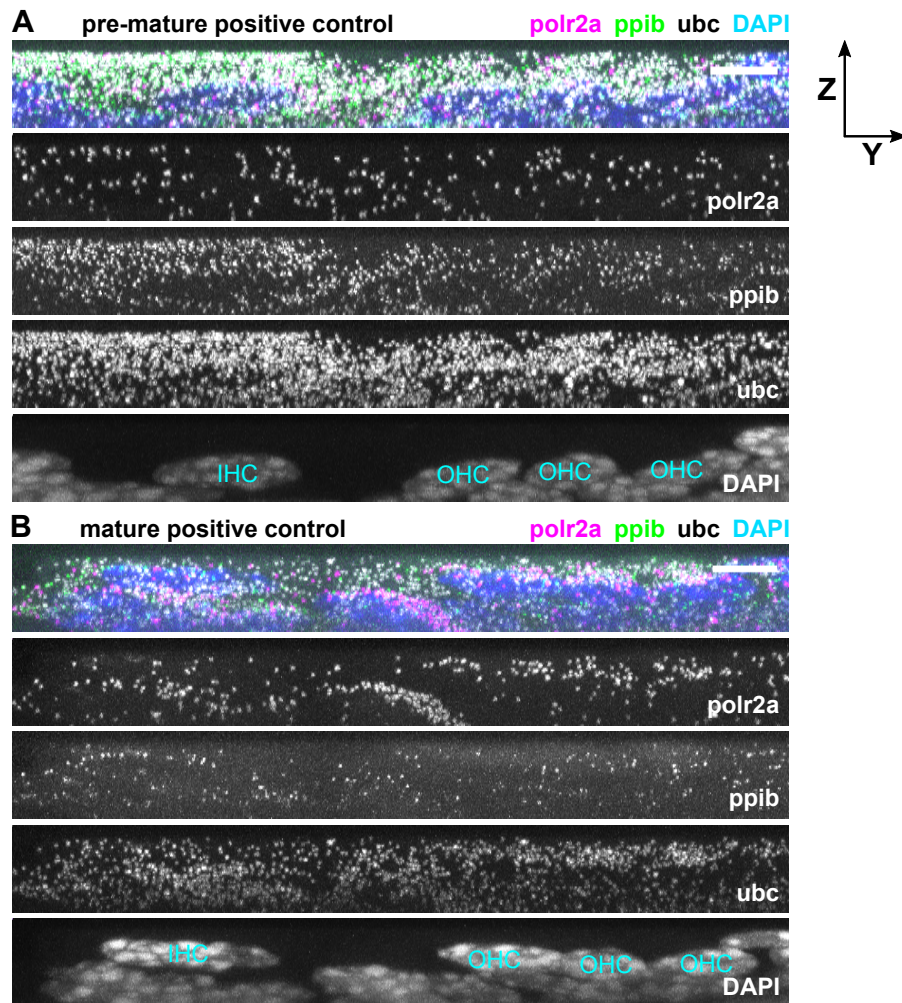

**Supplementary Figure 2.** Distribution of RNAscope® positive control signals in the OC. X-Axis projection of an IHC and neighboring three OHCs of a pre-mature (**A**) and a mature OC (**B**). RNAscope® signals of the positive control probes indicated in the graph are shown. For clarity, DAPI-stained nuclei labeled by cell type are shown at the respective bottom graph. Note that in both age groups mRNA dots are not specifically enriched in hair cells. Extension of Z-axis is inflated and not true to the scale bar. Diagram on the right indicates axes of the graphs. Scale bar: 5  $\mu$ m.
